# Supplementary material for: Different Pediatric Acute Care Settings Influence Bronchiolitis Management: A 10-Year Retrospective Study
Source: Life (Basel). 2023 Feb 24;13(3):635. doi: 10.3390/life13030635 (PMC10056632; doi:10.3390/life13030635)
Supplement: Supplementary file 1 [file life-13-00635-s001.zip › life-2116340-supplementary.pdf]

**Table S1.** Severity index of bronchiolitis [11].

|                           | Mild                                                     | Moderate                       | Severe                                        |
|---------------------------|----------------------------------------------------------|--------------------------------|-----------------------------------------------|
| <b>Respiratory rate</b>   | Normal to slightly increased                             | Increased                      | Markedly increased compared to normal values  |
| <b>Respiratory effort</b> | Mild chest wall retraction                               | Tracheal tug                   | Marked chest wall retraction                  |
|                           |                                                          | Nasal Flare                    | Nasal Flare                                   |
|                           |                                                          | Moderate chest wall retraction | Grunting                                      |
| <b>Oxygen Saturation</b>  | No supplemental oxygen requirement, O2 saturations > 95% | Saturation 90-95%              | Saturations < 90%, may not be corrected by O2 |
| <b>Feeding</b>            | Normal to slightly increased                             | 50-75% of normal feeds         | < 50% of feeds, unable to feed                |
| <b>Apnoea</b>             | Nil                                                      | May have brief episodes        | May have increasing episodes                  |

**Table S2.** Multivariate analysis of the predictors of the care setting for patients with bronchiolitis.

| Care setting                | Predictors           | OR     | 95% CI        | p-value           |
|-----------------------------|----------------------|--------|---------------|-------------------|
| <b>SSO vs PEDd</b>          | Age ≤ 3 months       | 1.483  | 0.958-2.295   | 0.077             |
|                             | Age ≤ 6 months       | 1.459  | 1.094-1.946   | <b>0.010</b>      |
|                             | Prematurity          | 2.626  | 1.266-5.446   | <b>0.009</b>      |
|                             | Other risk factors*  | 2.589  | 1.325-5.058   | <b>0.005</b>      |
|                             | Feeding difficulties | 1.863  | 1.431-2.425   | <b>&lt; 0.001</b> |
|                             | Days of symptoms     | 0.966  | 0.938-0.994   | <b>0.018</b>      |
|                             | SpO <sub>2</sub>     | 0.889  | 0.828-0.955   | <b>0.001</b>      |
|                             | Clinical severity°   | 3.174  | 2.085-4.834   | <b>&lt; 0.001</b> |
|                             | Fever                | 1.779  | 1.252-2.529   | <b>0.001</b>      |
|                             | Previous PED access  | 1.855  | 1.276-2.699   | <b>0.001</b>      |
| <b>Hospitalized vs PEDd</b> | Age ≤ 3 months       | 37.368 | 27.232-51.277 | <b>&lt; 0.001</b> |
|                             | Age ≤ 6 months       | 5.677  | 4.302 -7.490  | <b>&lt; 0.001</b> |
|                             | Prematurity          | 7.945  | 4.469-14.122  | <b>&lt; 0.001</b> |
|                             | Other risk factors*  | 13.073 | 7.787-21.946  | <b>&lt; 0.001</b> |
|                             | Feeding difficulties | 4.879  | 3.886 - 6.127 | <b>&lt; 0.001</b> |
|                             | Days of symptoms     | 1.010  | 0.992- 1.029  | 0.263             |
|                             | SpO <sub>2</sub>     | 0.787  | 0.739-0.837   | <b>&lt; 0.001</b> |
|                             | Clinical severity°   | 6.588  | 4.570- 9.497  | <b>&lt; 0.001</b> |
|                             | Fever                | 2.226  | 1.570 -3.156  | <b>&lt; 0.001</b> |
|                             | Previous PED access  | 4.287  | 3.174- 5.791  | <b>&lt; 0.001</b> |

Significant p-values are indicated in bold. CI: confidence interval; OR: odds ratio; PEDd: discharged from the Pediatric Emergency Department; SpO<sub>2</sub>: peripheral oxygen saturation; SSO: Short-stay Observation unit; \*Other risk factors include: previous episodes of apnea, history of chronic lung or congenital heart disease, immunodeficiency, severe neurological or muscular disease; ° according to the Italian inter-society consensus document on bronchiolitis [11].

**Table S3.** Bivariate tests of the predictors of pharmacological therapies and CXR use.

|                                        | Not administered<br>therapy / Not<br>performed CXR | Administered therapy<br>/ Performed CXR | <i>p</i> -value   |
|----------------------------------------|----------------------------------------------------|-----------------------------------------|-------------------|
| <b>Systemic corticosteroids, n (%)</b> | <b>1763 (55.1%)</b>                                | <b>1438 (44.9%)</b>                     |                   |
| PEDd                                   | 1001 (56.8%)                                       | 639 (44.4%)                             | <b>&lt; 0.001</b> |
| SSO                                    | 127 (7.2%)                                         | 187 (13%)                               | <b>&lt; 0.001</b> |
| Hospitalization                        | 635 (36%)                                          | 612 (42.6%)                             | <b>&lt; 0.001</b> |
| Age ≤ 3 months                         | 464 (26.3%)                                        | 321 (22.3%)                             | <b>0.033</b>      |
| Age ≤ 6 months                         | 482 (27.3%)                                        | 416 (28.9%)                             | <b>0.033</b>      |
| Age > 6 months                         | 817 (46.3%)                                        | 701 (48.7%)                             | <b>0.033</b>      |
| Prematurity                            | 106 (6%)                                           | 132 (9.2%)                              | <b>&lt; 0.001</b> |
| Other risk factors*                    | 134 (7.6%)                                         | 167 (11.6%)                             | <b>&lt; 0.001</b> |
| Severity_mild°                         | 1544 (87.6%)                                       | 973 (67.7%)                             | <b>&lt; 0.001</b> |
| Severity_moderate°                     | 210 (11.9%)                                        | 430 (29.9%)                             | <b>&lt; 0.001</b> |
| Severity_severe°                       | 9 (0.5%)                                           | 35 (2.4%)                               | <b>&lt; 0.001</b> |
| Fever                                  | 241 (13.8%)                                        | 139 (9.8%)                              | <b>&lt; 0.001</b> |
| CXR                                    | 781 (44.3%)                                        | 749 (52.1%)                             | <b>&lt; 0.001</b> |
| Bronchopneumonia                       | 218 (12.4%)                                        | 308 (21.4%)                             | <b>&lt; 0.001</b> |
| <b>Antibiotics</b>                     | <b>1446 (45.2%)</b>                                | <b>1755 (54.8%)</b>                     |                   |
| PEDd                                   | 667 (46.1%)                                        | 973 (55.4%)                             | <b>&lt; 0.001</b> |
| SSO                                    | 152 (10.5%)                                        | 162 (9.2%)                              | <b>&lt; 0.001</b> |
| Hospitalization                        | 627 (43.4%)                                        | 620 (35.3%)                             | <b>&lt; 0.001</b> |
| Age ≤ 3 months                         | 443 (30.6%)                                        | 342 (19.5%)                             | <b>&lt; 0.001</b> |
| Age ≤ 6 months                         | 439 (30.4%)                                        | 459 (26.2%)                             | <b>&lt; 0.001</b> |
| Age > 6 months                         | 564 (39%)                                          | 954 (54.4%)                             | <b>&lt; 0.001</b> |
| Prematurity                            | 113 (7.8%)                                         | 125 (7.1%)                              | 0.500             |
| Other risk factors*                    | 139 (9.6%)                                         | 162 (9.2%)                              | 0.758             |
| Severity_mild°                         | 1125 (77.8%)                                       | 1392 (79.3%)                            | <b>0.002</b>      |
| Severity_moderate°                     | 311 (21.5%)                                        | 329 (18.7%)                             | <b>0.002</b>      |
| Severity_severe°                       | 10 (0.7%)                                          | 34 (1.9%)                               | <b>0.002</b>      |
| Fever                                  | 87 (6.1%)                                          | 293 (16.8%)                             | <b>&lt; 0.001</b> |
| CXR                                    | 552 (38.2%)                                        | 978 (55.7%)                             | <b>&lt; 0.001</b> |
| Bronchopneumonia                       | 72 (5%)                                            | 454 (25.9%)                             | <b>&lt; 0.001</b> |
| <b>Adrenaline aerosols, n (%)</b>      | <b>580 (46.5%)</b>                                 | <b>667 (53.5%)</b>                      |                   |
| Age ≤ 3 months                         | 228 (39.3%)                                        | 381 (57.1%)                             | <b>&lt; 0.001</b> |
| Age ≤ 6 months                         | 176 (30.3%)                                        | 201 (30.1%)                             | <b>&lt; 0.001</b> |
| Age > 6 months                         | 176 (30.3%)                                        | 85 (12.7%)                              | <b>&lt; 0.001</b> |
| Prematurity                            | 94 (16.2%)                                         | 107 (16.0%)                             | 1.000             |

|                                   |                     |                     |                   |
|-----------------------------------|---------------------|---------------------|-------------------|
| Other risk factors*               | 131 (22.6%)         | 127 (19.0%)         | 0.141             |
| Severity_mild°                    | 388 (66.9%)         | 331 (49.6%)         | <b>&lt; 0.001</b> |
| Severity_moderate°                | 184 (31.7%)         | 304 (45.6%)         | <b>&lt; 0.001</b> |
| Severity_severe°                  | 8 (1.4%)            | 32 (4.8%)           | <b>&lt; 0.001</b> |
| Fever                             | 81 (14.1%)          | 71 (10.7%)          | 0.084             |
| CXR                               | 350 (60.3%)         | 529 (79.3%)         | <b>&lt; 0.001</b> |
| Bronchopneumonia                  | 126 (21.7%)         | 245 (36.7%)         | <b>&lt; 0.001</b> |
| <b>Salbutamol aerosols, n (%)</b> | <b>1218 (38.1%)</b> | <b>1983 (61.9%)</b> |                   |
| PEDd                              | 392 (32.2%)         | 1248 (62.9%)        | <b>&lt; 0.001</b> |
| SSO                               | 56 (4.6%)           | 258 (13%)           | <b>&lt; 0.001</b> |
| Hospitalization                   | 770 (63.2%)         | 477 (24.1%)         | <b>&lt; 0.001</b> |
| Age ≤ 3 months                    | 634 (52.1%)         | 151 (7.6%)          | <b>&lt; 0.001</b> |
| Age ≤ 6 months                    | 289 (23.7%)         | 609 (30.7%)         | <b>&lt; 0.001</b> |
| Age > 6 months                    | 295 (24.2%)         | 1223 (61.7%)        | <b>&lt; 0.001</b> |
| Prematurity                       | 121 (9.9%)          | 117 (5.9%)          | <b>&lt; 0.001</b> |
| Other risk factors*               | 149 (12.2%)         | 152 (7.7%)          | <b>&lt; 0.001</b> |
| Severity_mild°                    | 915 (75.1%)         | 1602 (80.8%)        | <b>&lt; 0.001</b> |
| Severity_moderate°                | 281 (23.1%)         | 359 (18.1%)         | <b>&lt; 0.001</b> |
| Severity_severe°                  | 22 (1.8%)           | 22 (1.1%)           | <b>&lt; 0.001</b> |
| Fever                             | 153 (12.6%)         | 227 (11.6%)         | 0.406             |
| CXR                               | 684 (56.2%)         | 846 (42.7%)         | <b>&lt; 0.001</b> |
| Bronchopneumonia                  | 222 (18.2%)         | 304 (15.3%)         | <b>0.036</b>      |
| <b>CXR, n (%)</b>                 | <b>1671 (52.2%)</b> | <b>1530 (47.8%)</b> |                   |
| PEDd                              | 1143 (68.4%)        | 497 (32.5%)         | <b>&lt; 0.001</b> |
| SSO                               | 160 (9.6%)          | 154 (10.1%)         | <b>&lt; 0.001</b> |
| Hospitalization                   | 368 (22.0%)         | 879 (57.5%)         | <b>&lt; 0.001</b> |
| Age ≤ 3 months                    | 321 (19.2%)         | 464 (30.3%)         | <b>&lt; 0.001</b> |
| Age ≤ 6 months                    | 456 (27.3%)         | 442 (28.9%)         | <b>&lt; 0.001</b> |
| Age > 6 months                    | 894 (53.5%)         | 624 (40.8%)         | <b>&lt; 0.001</b> |
| Prematurity                       | 66 (3.9%)           | 172 (11.2%)         | <b>&lt; 0.001</b> |
| Other risk factors*               | 98 (5.9%)           | 203 (13.3%)         | <b>&lt; 0.001</b> |
| Severity_mild°                    | 1427 (85.4%)        | 1090 (71.2%)        | <b>&lt; 0.001</b> |
| Severity_moderate°                | 237 (14.2%)         | 403 (26.3%)         | <b>&lt; 0.001</b> |
| Severity_severe°                  | 7 (0.4%)            | 37 (2.4%)           | <b>&lt; 0.001</b> |
| Fever                             | 163 (9.9%)          | 217 (14.3%)         | <b>&lt; 0.001</b> |

Results are reported as total number, percentage and p-value (statistically significant if < 0.05). Significant differences for p-values are indicated in bold. PEDd: discharged from the Pediatric Emergency Department, SSO: short-stay observation unit; CXR: chest X-ray. \*Other risk factors include: previous episodes of apnea, history of chronic lung or congenital heart disease, immunodeficiency, severe neurological or muscular disease; ° according to the Italian inter-society consensus document on bronchiolitis [11].
